RESEARCH ARTICLE

# Prescription opioid misuse in people with chronic noncancer pain: A multi-variable analysis of sociodemographic, clinical, and psychological factors

Carmen Ramírez-Maestre<sup>1,2</sup>, Rosa Esteve<sup>1,2</sup>, Elena R. Serrano-Ibáñez<sup>1,2\*</sup>, Alicia E. López-Martínez<sup>1,2</sup>

**1** Universidad de Málaga, Facultad de Psicología y Logopedia, Andalucía Tech, Málaga, Spain, **2** Instituto de Investigación Biomédica de Málaga y Plataforma en Nanomedicina (IBIMA Plataforma BIONAND), Málaga, Spain

\* [elenarserrano@uma.es](mailto:elenarserrano@uma.es)

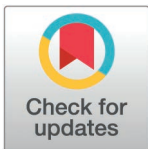

## OPEN ACCESS

**Citation:** Ramírez-Maestre C, Esteve R, Serrano-Ibáñez ER, López-Martínez AE (2025) Prescription opioid misuse in people with chronic noncancer pain: A multi-variable analysis of sociodemographic, clinical, and psychological factors. PLoS One 20(10): e0334918. <https://doi.org/10.1371/journal.pone.0334918>

**Editor:** Shivanand Kattimani, Jawaharlal Institute of Postgraduate Medical Education and Research, INDIA

**Received:** April 10, 2025

**Accepted:** October 4, 2025

**Published:** October 22, 2025

**Copyright:** © 2025 Ramírez-Maestre et al. This is an open access article distributed under the terms of the [Creative Commons Attribution License](https://creativecommons.org/licenses/by/4.0/), which permits unrestricted use, distribution, and reproduction in any medium, provided the original author and source are credited.

**Data availability statement:** The data underlying the results presented in the study are

## Abstract

Previous research has identified associations between sociodemographic, clinical, and psychological factors and prescription opioid misuse in individuals with chronic noncancer pain (CNCP). A two-study design was used to identify the factors with the most robust association with prescription opioid misuse (Study 1) and to cross-validate these associations in a second sample of people with CNCP to select a reduced number of variables (Study 2). Study 1 included 187 people with CNCP. Point biserial and bivariate correlations, and chi-square analysis showed that the variables significantly associated with opioid misuse were impulsiveness, anxiety sensitivity (AS), pain acceptance, pain catastrophizing, anxiety, depression, posttraumatic stress symptoms (PTSD), and social desirability (medium effect sizes). A family history of alcohol/drug abuse and being between 16 and 45 years of age also reached statistical significance. Study 2 included 179 people with CNCP. The results corroborated the associations found between opioid misuse and impulsiveness, AS, pain acceptance, pain catastrophizing, anxiety, depression, and PTSD. Logistic regression showed that AS, PTSD, and pain acceptance contributed significantly to the unique variance in prescription opioid misuse. Therefore, when prescribing opioids, clinicians should increase the supervision of those people with high AS, PTSD, and low pain acceptance. Evaluating these three variables in people with CNCP who are eligible for opioid therapy could aid in their therapeutic management and help prevent possible iatrogenic effects of opioids. Likewise, this could significantly enhance individual well-being and help mitigate the social problem associated with the misuse of prescription opioids.

available from Zenodo (<https://zenodo.org/records/15740694>).

**Funding:** This study was supported by grants from the Spanish Ministry of Science and Innovation (PID2019-106086RB-I00) and the Regional Government of Andalusia (HUM-566, P07-SEJ-3067). There was no additional external funding received for this study. The funders had no role in study design, data collection and analysis, decision to publish, or preparation of the manuscript.

**Competing interests:** The authors have declared that no competing interests exist.

## Introduction

Chronic non-cancer pain (CNCP) is defined as pain that persists or recurs for more than 3 months and is not caused by cancer. The most common types of CNCP include musculoskeletal pain (e.g., low back pain, fibromyalgia), neuropathic pain (e.g., trigeminal neuralgia), functional pain syndromes (e.g., irritable bowel syndrome), chronic postsurgical pain (e.g., chronic pain after spinal surgery), and complex regional pain syndrome (e.g., Reflex Sympathetic Dystrophy) [1]. It is a global health problem and a leading cause of medical consultations, disability, and healthcare costs [1]. Among the main therapeutic approaches to its management is the prescription of opioids [2]. While meta-analyses demonstrate the efficacy of this approach (e.g., [3]), other studies also highlight the risks associated with this treatment [4]. Following the publication of clinical guidelines for prescribing opioids [5], a decrease in prescriptions for these drugs has been observed in the United States; however, there has been a notable increase in opioid prescriptions in Europe in recent decades [6]. This has been particularly evident in Spain, where the defined daily dose of opioids per thousand inhabitants (DDD) has almost doubled from 2015 to the present day [7]. One of the most common adverse effects of long-term opioid treatment for chronic pain is opioid misuse [4]. This is defined as using opioids other than those prescribed, including overuse [8]. A recent meta-analysis showed that the misuse of prescription opioids is relatively frequent among patients with chronic pain undergoing opioid therapy. Estimates indicate that approximately 10% meet criteria for opioid dependence or use disorder, around 33% present with clinical signs or symptoms suggestive of these conditions, and nearly 20% demonstrate aberrant drug-related behaviors [9]. Nearly half of patients receiving treatment for opioid use disorder began by misusing a prescription pain management medication [10].

The scientific literature identifies multiple variables associated with opioid misuse in people with CNCP. These variables include sociodemographic and clinical factors such as age, obesity, smoking, benzodiazepine use, a family or personal history of substance abuse, and duration of opioid treatment [11–15]. Psychological variables have also been shown to contribute to opioid misuse [8]. A positive association has been found between diagnoses of anxiety, depression, and other serious mental illnesses, and opioid misuse [16]. Similarly, experiencing sexual abuse in childhood or suffering from posttraumatic stress disorder (PTSD) appears to increase the risk of developing an opioid use disorder after exposure to opioid analgesics [15,17–19]. Regarding PTSD, a review indicated that 18% of people who use opioids also experience this disorder [20]. Furthermore, prescription opioid misuse is frequently reported among people with coexisting chronic pain and PTSD [21]. An association has also been found between pain catastrophizing, or the anticipation of uncontrollable negative outcomes, and opioid misuse [8,22,23]. However, other studies (e.g., [24]) have not found this association. Instead, their results suggest that pain acceptance is the variable associated with opioid misuse, with anxious-depressive symptoms mediating this relationship [24]. As a process within the psychological flexibility model [25], acceptance involves dealing with stressful experiences without attempting to

control or avoid them, while continuing to engage in meaningful daily activities despite their presence [26]. Furthermore, pain acceptance involves coming into direct contact with unpleasant experiences, such as pain sensations or pain-related thoughts and emotions, without attempting to control or avoid them [27]. Several studies have found significant positive associations between pain non-acceptance and opioid misuse (e.g., [28]).

When analysing which transdiagnostic psychological variables could be involved in opioid misuse, studies have found that anxiety sensitivity (AS; fear of anxiety-related physical sensations) or impulsiveness (poorly thought out, hasty, excessively risk or inappropriate actions that often lead to undesirable consequences) could be contributing factors [28–31]. The fear-avoidance model includes AS as a variable present in individuals prior to pain onset [32]. A recent investigation [28] found that impulsivity and AS are antecedent factors that may predispose individuals with CNCP to poor adaptation to chronic pain and prescription opioid misuse. On the other hand, Zvolensky et al. [14] showed indirect effects of PTSD severity via AS in relation to opioid misuse. Furthermore, associations have also been found between impulsiveness (i.e., poorly thought out, hasty, excessively risky, or inappropriate actions that often lead to undesirable consequences) and prescription opioid misuse in individuals with CNCP [31].

Finally, previous research has also shown that social desirability influences self-reported substance abuse [33]. These authors found an association between higher levels of social desirability and a lower frequency of self-reports of abuse and/or opioid misuse in individuals with CNCP. They also suggested that the social stigma associated with opioid abuse and misuse could explain this result [33].

In summary, numerous studies have examined the relationship between sociodemographic, clinical, and psychological factors and prescription opioid misuse in people with chronic pain [19]. However, most research has focused on the role of a limited number of these variables in isolation. Notably, many of these factors are closely related, making it difficult to determine the nature of their associations with prescription opioid misuse. Therefore, confounding may occur when investigating associations between a single factor and an outcome variable, such as opioid misuse, as it remains unclear whether the association arises from the factor analysed or from a related variable that has not been considered [34].

This study aimed to identify those factors with the most robust association with prescription opioid misuse (Study 1) and cross-validate the associations found in a second sample in order to select a reduced number of variables (Study 2).

## Study 1: Identify the variables with the most robust association with opioid misuse

### Materials and methods (Study 1)

We hypothesized that there would be a significant positive association between prescription opioid misuse and being aged between 16 and 45 years (hypothesis 1, H1), body mass index greater than 30 (H2), a history of smoking and being a current smoker (H3), time in treatment with opioids (H4), benzodiazepine use (H5), [11–14]; depressive symptoms (H6), anxious symptoms (H7), serious mental illness (H8), [16], history of child sexual abuse (H9) [18], severity of PTSD symptoms (H10) [17–20]; personal or family history of substance abuse (H11) [15]; AS (H12), impulsiveness (H13) [28–31], and pain catastrophizing (H14) [22–23]. Additionally, we hypothesized that there would be a significant negative association between pain acceptance (H15) [24–27], social desirability (H16) [33], and opioid misuse.

**Participants.** The required sample size was estimated using GPower 3.1 software for a linear multiple regression analysis, aiming to detect a medium effect size (Cohen's  $f^2 = 0.15$ ) with a statistical power of 0.80 and an alpha level of 0.05 (two-tailed). Based on a model including 15 predictor variables, the analysis indicated that a minimum of 139 participants would be necessary to detect statistically significant relationships with 95% confidence. This estimation aligns with Green's [35] recommendation for regression models, which suggests a minimum sample size of  $n \geq 50 + 8m^*$  (where  $m$  is the number of predictors), yielding  $n \geq 170$  in this case. Therefore, a target sample size of at least 139–170 subjects was considered appropriate to ensure sufficient statistical power and model

Additionally, according to Freeman [36], the sample size required for logistic regression analysis must be  $[n = 10 * (k + 1)]$  (where  $k$  = number of variables). This study required at least 160 participants  $[10 * (15 + 1) = 160]$ .

The Study 1 participants comprised a consecutive sample of 187 individuals with CNCP from Spain (Europe) who attended 3 pain units of general hospitals. Inclusion criteria were as follows: participants had to be experiencing CNCP at the time of the study and had been receiving pharmacological treatment that included opioid analgesics for a minimum of 3 months; additionally, they were required to have sufficient proficiency in the Spanish language to understand the study procedures. Exclusion criteria included current treatment for a malignancy, the presence of a terminal illness, or the diagnosis of a severe psychiatric disorder (e.g., schizophrenia, psychotic disorders) in the acute phase, as determined by the mental health unit, which could interfere with study participation.

**Procedures (Study 1 and 2).** This research (Study 1 and 2) is part of a research project that was approved by the Research Ethics Committee of the Province of Andalusia (PEIBA; CEIP-281021). Written informed consent was obtained prior to data collection. We confirm that all research was performed in accordance with relevant guidelines/regulations.

At the end of the appointment with their pain physician, each patient who was believed by the pain specialist to meet the eligibility criteria was informed of the study aims and their participation was requested. Three psychologists contacted the participants by telephone, assessed their eligibility based on the inclusion criteria, and scheduled appointments with those who consented to participate in the study. Each participant took part in a semi-structured interview with a psychologist from the research team to obtain sociodemographic variables and medical history data. A battery of questionnaires, which measured the variables that we expected to be related to the misuse of prescription opioids, was also completed by each participant in this assessment session. The interviews took about 90 min on average to complete. Neither the participants nor their referring physicians received any economic compensation for study participation. The patients were always assessed in their usual health centre (pain unit).

**Measures.** *Opioid Risk Tool:* The Opioid Risk Tool (ORT-10; [37,38]) was used to evaluate family and personal history of substance abuse, age, a history of preadolescent sexual abuse, and specific psychological disorders (i.e., having a diagnosis of attention deficit disorder, obsessive-compulsive disorder, bipolar disorder, schizophrenia, or depression). The ORT-10 is a 10-item scale that assesses these five domains or factors associated with prescription opioid misuse.

*Barratt Impulsiveness Scale:* The 30-item Barratt Impulsiveness Scale for adults (BIS-11; [39–41]) was used to measure impulsiveness. Items describing different forms of impulsiveness are rated on a 4-point scale ranging from 1 (“Rarely or never”) to 4 (“Always”). Higher total scores indicate higher levels of impulsiveness. Internal consistency in our sample was adequate (Study 1:  $\alpha = .79$ ; Study 2:  $\alpha = .70$ ).

*Anxiety Sensitivity Index:* The 18-item Anxiety Sensitivity Index (ASI-3; [42–44]) was used to measure the severity of AS symptoms. Items are rated on a 5-point scale ranging from 0 (“Very little”) to 4 (“Very much”). If the total score is equal to or greater than 23, the respondents are classified as having a high level of AS [40]. Internal consistency in the present study was excellent (Study 1:  $\alpha = .92$ ; Study 2:  $\alpha = .93$ ).

*Posttraumatic Stress Disorder Checklist for DSM-5:* The Posttraumatic Stress Disorder Checklist for DSM-5 (PCL-5; [44]) was used to assess PTSD as described in DSM-5. This instrument comprises a 20-item self-report checklist which is rated on a 5-point Likert-scale (ranging from 1 = never to 5 = very often) to indicate the degree to which each symptom had been experienced by the participant over the past month. Internal consistency in the present study was excellent (Study 1:  $\alpha = .93$ ; Study 2:  $\alpha = .90$ ).

*Pain Catastrophizing Scale:* The 13-item Pain Catastrophizing Scale (PCS; [46,47]) assesses the degree to which respondents experience various catastrophizing-related thoughts and feelings when in pain. Respondents indicate how often they have such thoughts on a 5-point scale ranging from 1 (“Never”) to 4 (“Always”). Although the items can be scored to measure three components of catastrophizing (i.e., rumination, magnification, and helplessness), we used the total score, which is the one most often used in research. Internal consistency in our sample was excellent (Study 1:  $\alpha = .91$ ; Study 2:  $\alpha = .92$ ).

**Chronic Pain Acceptance Questionnaire:** We administered the 20-item of the Chronic Pain Acceptance Questionnaire (CPAQ-SV; [48,49]). The items on the CPAQ can be scored on either of two subscales (Pain Willingness and Activity Engagement) or on both. The former subscale assesses a general willingness to experience pain, and the latter subscale measures engagement in activities despite pain (i.e., the opposite of pain interference). Respondents rate how often they experience pain willingness and activity engagement on a 7-point scale ranging from 0 ("Never") to 6 ("Always"). The CPAQ-SV is similar to the original scale in that it yields a total score and two subscale scores for Pain Willingness and Activity Engagement. This study only used the total score. Internal consistency in our sample was good (Study 1:  $\alpha = .89$ ; Study 2:  $\alpha = .84$ ).

**Hospital Anxiety and Depression Scale:** The Hospital Anxiety and Depression Scale (HADS; [50,51]) is a self-reporting scale that contains two 7-item subscales: one measures anxiety and the other measures depression. These subscales are scored on a 4-point scale ranging from 1 ("Rarely") to 4 ("Often"). This study used both subscales. Internal consistency of both scales in our sample was high (Study 1:  $\alpha = .85$  for anxiety;  $\alpha = .86$  for depression; Study 2:  $\alpha = .83$  for anxiety;  $\alpha = .85$  for depression).

**Numerical rating scale:** Participants were asked to rate their current pain intensity, as well as their least, average, and worst pain intensity during the past 2 weeks, on a numerical rating scale ranging from 0 ("No pain") to 10 ("Pain as intense as you could imagine"). A composite measure of characteristic pain intensity was computed for each participant by calculating the average of the least, average, worst, and current pain ratings. Such composite scores have been shown to be very reliable in individuals with chronic pain [52]. The internal consistency of the composite score in our sample indicated good reliability (Study 1:  $\alpha = .83$ ; Study 2:  $\alpha = .80$ ).

**Opioid intake doses:** To assess prescribed opioid intake, we asked participants about their current pain medications, dosages, and frequency of intake. We then computed morphine milligram equivalents (MME) using the methods recommended by Dowell and colleagues [53]: MME/day.

**Current Opioid Misuse Measure:** The current misuse of prescribed opioids was assessed by means of the Current Opioid Misuse Measure (COMM; [54,55], which is a brief self-assessment measure developed to monitor chronic pain patients on opioid therapy. The COMM comprises 17 items asking participants to rate how often they engaged in opioid misuse behaviour in the past 30 days on a scale ranging from 0 ("Never") to 4 ("Very often"). The items are then summed to create a total score. A total score of 9 or more is considered to be an indication of high risk for opioid misuse. Using this cut-off point, the variable is analysed as dichotomous (misuse/no misuse). However, following the findings of Rogers et al. [56], the COMM total score is also used. Therefore, both the COMM total score and the cut-off point were used in the current study. In our samples, the internal consistency of the measure was good (Study 1:  $\alpha = .84$ ; Study 2:  $\alpha = .75$ ).

**Marlowe-Crowne Social Desirability Scale:** To evaluate the potential impact of social desirability bias on response, the short version of the Marlowe-Crowne Social Desirability Scale (MCSDS; [57]) was used. This instrument measures the tendency of participants to give answers according to social norms. The scale consists of 18 dichotomous items (yes/no) and showed high internal consistency ( $\alpha$  between 0.72 and 0.80). In sample 1, Cronbach's alpha value was low but similar to those obtained in previous studies [57]:  $\alpha = .70$ . However, in sample 2 Cronbach's alpha value did not reach an acceptable level ( $\alpha = .65$ ).

**Statistical Analysis.** In both studies, descriptive statistics were generated for the demographic, clinical, and other variables to describe the samples and studies variables.

The potential factors that have been identified in the literature were evaluated for potential univariate associations with opioid misuse. We treated opioid misuse as both a continuous and a dichotomous variable and computed bivariate correlation coefficients (to analyse the strength and direction of the relationship between two continuous variables) and the point biserial correlation coefficients (to analyse the strength and direction of the relationship between a continuous variable and a dichotomous variable) to test its association with the continuous hypothesised variables. Correlations can be interpreted following the guidelines proposed by Cohen [58]; however, these are only guidelines and should be

adapted according to the hypothesis and goals of the study [59]. Furthermore, it must be taken into account that a high point-biserial correlation is smaller than what might be considered to be a high Pearson correlation between two quantitative variables [60]. Chi square tests and contingency analysis were used to test the association between opioid misuse and categorical variables. In order to know how strongly each categorical variable was associated with opioid misuse, Cramer's V was calculated as an effect size measurement for the chi-square test of independence. As Cohen [58] suggested, for chi-square tests with degrees of freedom equal to 2, a value of Cramer's V within the range of .07–.21 indicates a small effect, a value ranging from .21 to .35 indicates a medium effect, and a value equal to or more than .35 indicates a large effect [58,61]. Missing values were replaced with the mean of the available data.

In both studies, all data were analysed using the SPSS 22.0 software package for Windows (SPSS Inc., Chicago, IL).

## Results (Study 1)

**Participants.** The Study 1 participants comprised a consecutive sample of 187 individuals with CNCP from Spain (Europe; same race and ethnicity) who were recruited while attending clinical consultations in 3 outpatient pain units of general hospitals (see Fig 1). The recruitment process lasted from May 2021 to July 2022.

Table 1 shows the participants' demographic and clinical characteristics.

In total, 59% of the participants had a score of more than 9 on the COMM, which indicates prescribed opioid misuse, and 73% of the participants had a prescription for benzodiazepines. Mean pain duration was 15 years (mean = 177.4 months; SD = 146.1), and mean time on opioids was 47 months (SD = 50.5).

**Descriptive and correlation analyses.** Table 2 shows the means, standard deviations, and point biserial correlation coefficients between continuous antecedent variables and the dichotomous outcome variable *misuse/non-misuse*. The variable Social Desirability was included in this analysis. To be conservative in this first study, and considering that a high point-biserial correlation is smaller than what might be considered to be a high Pearson

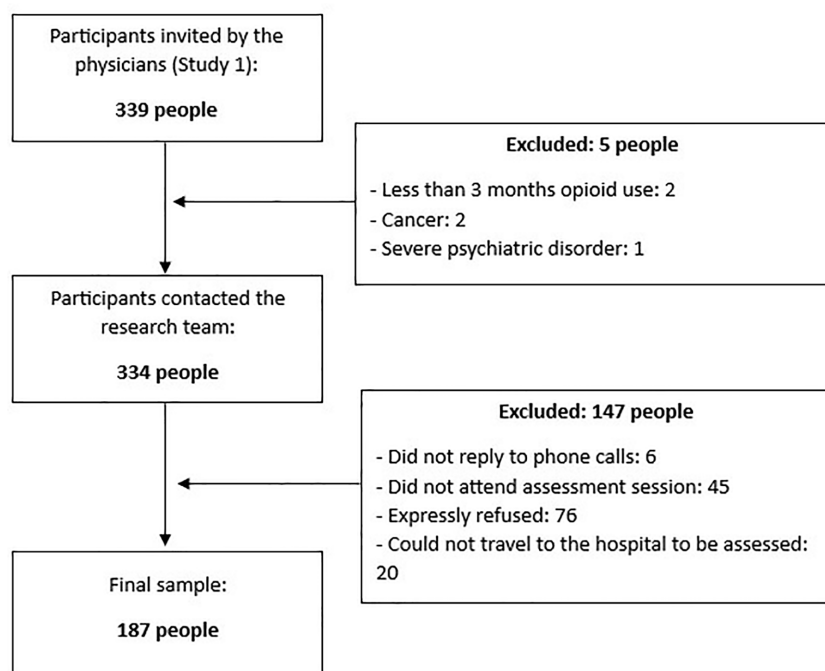

**Fig 1. Recruitment of Study 1 participants.**

<https://doi.org/10.1371/journal.pone.0334918.g001>

**Table 1. Demographic and Clinical characteristics of the study sample (N=187).**

| <b>Variables</b>                            | <b>Mean</b> | <b>SD</b> | <b>Min/max</b> |
|---------------------------------------------|-------------|-----------|----------------|
| Age (years)                                 | 56.1        | 11.6      | 24/85          |
| Time in pain (months)                       | 177.4       | 146.1     | 10/636         |
| Pain Intensity                              | 6.6         | 1.6       | 1/10           |
| Daily MME/day                               | 58.1        | 78.1      | 1.6/530        |
| Time in treatment with opioids (months)     | 46.8        | 50.9      | 3/300          |
|                                             | N           | %         |                |
| <b>Sex</b>                                  |             |           |                |
| Men                                         | 64          | 34        |                |
| Women                                       | 123         | 66        |                |
| <b>Marital status</b>                       |             |           |                |
| Single                                      | 20          | 11        |                |
| Married/Unmarried couple                    | 124         | 66        |                |
| Divorced/Separated                          | 31          | 17        |                |
| Widowed                                     | 12          | 6         |                |
| <b>Education</b>                            |             |           |                |
| Reading and writing                         | 13          | 7         |                |
| Primary school                              | 48          | 26        |                |
| High school                                 | 92          | 49        |                |
| University education                        | 34          | 18        |                |
| <b>Work Status</b>                          |             |           |                |
| Housekeeping                                | 6           | 3         |                |
| Working                                     | 48          | 26        |                |
| Studying                                    | 2           | 1         |                |
| Unemployed                                  | 49          | 26        |                |
| Retired                                     | 82          | 44        |                |
| <b>Site of Pain</b>                         |             |           |                |
| Head                                        | 78          | 42        |                |
| Neck                                        | 103         | 55        |                |
| Chest                                       | 40          | 21        |                |
| Shoulders                                   | 110         | 59        |                |
| Back (Lumbar)                               | 151         | 81        |                |
| Arms                                        | 91          | 49        |                |
| Hands                                       | 94          | 50        |                |
| Hips                                        | 103         | 55        |                |
| Thoracic                                    | 81          | 43        |                |
| Legs                                        | 139         | 74        |                |
| Feet                                        | 92          | 49        |                |
| <b>Diagnosis</b>                            |             |           |                |
| Functional pain syndromes<br>(Fibromyalgia) | 55          | 29        |                |
| Complex regional pain syndrome              | 3           | 2         |                |
| Primary musculoskeletal pain                | 14          | 8         |                |
| Post-surgical/ Post-traumatic               | 23          | 12        |                |
| Neuropathic pain                            | 14          | 8         |                |
| Orofacial pain/Headaches                    | 1           | 1         |                |
| Musculoskeletal pain                        | 77          | 41        |                |

(Continued)

**Table 1.** (Continued)

| Variables                                     | Mean | SD | Min/max |
|-----------------------------------------------|------|----|---------|
| <b>Medication use</b>                         |      |    |         |
| <b>Prescribed opioids</b>                     |      |    |         |
| Tramadol                                      | 47   | 25 |         |
| Tramadol + Dexketoprofen                      | 3    | 2  |         |
| Tramadol + Paracetamol                        | 37   | 20 |         |
| Tapentadol                                    | 63   | 34 |         |
| Fentanyl transdermal patch                    | 16   | 9  |         |
| Fentanyl sublingual tablets                   | 5    | 3  |         |
| Oxycodone                                     | 4    | 2  |         |
| Oxycodone hydrochloride                       | 27   | 14 |         |
| Buprenorphine transdermal patch               | 4    | 2  |         |
| Morphine                                      | 11   | 6  |         |
| Codeine                                       | 4    | 2  |         |
| <b>Adjuvant medications for treating pain</b> |      |    |         |
| Benzodiazepines                               | 136  | 73 |         |
| Antidepressants                               | 123  | 66 |         |
| Antiepileptic drugs                           | 102  | 55 |         |
| Hypnotics                                     | 12   | 6  |         |

Note. MME: Morphine Milligram Equivalents

MME= 58.1 is considered a moderate dose (Dowell et al., 2016)

<https://doi.org/10.1371/journal.pone.0334918.t001>

**Table 2. Means, Standard Deviations, and Correlations between the model variables (Sample 1: N = 187).**

|                                             | Min/max | M    | SD   | 1      | 2      | 3     | 4      | 5      | 6     | 7     | 8      | 9      | 10  | 11    |
|---------------------------------------------|---------|------|------|--------|--------|-------|--------|--------|-------|-------|--------|--------|-----|-------|
| 1. Impulsiveness                            | 6/84    | 42.5 | 16.5 | 1      |        |       |        |        |       |       |        |        |     |       |
| 2. Anxiety Sensitivity                      | 0/72    | 18.7 | 16.6 | .28**  | 1      |       |        |        |       |       |        |        |     |       |
| 3. PTSD symptoms                            | 0/77    | 38.8 | 15.8 | .40**  | .40**  | 1     |        |        |       |       |        |        |     |       |
| 4. Catastrophizing                          | 13/52   | 36.3 | 10.3 | .16    | .41**  | .24** | 1      |        |       |       |        |        |     |       |
| 5. Acceptance                               | 4/110   | 47.1 | 25.2 | -.16*  | -.32** | -.20* | -.64** | 1      |       |       |        |        |     |       |
| 6. Pain                                     | 1/10    | 6.6  | 1.6  | .07    | .23**  | .15   | .29**  | -.24** | 1     |       |        |        |     |       |
| 7. Anxiety                                  | 7/28    | 18.3 | 9.1  | .44**  | .44**  | .50** | .51**  | -.39** | .33** | 1     |        |        |     |       |
| 8. Depression                               | 7/28    | 16.2 | 5.9  | .36**  | .35**  | .33** | .46**  | -.63** | .26** | .65** | 1      |        |     |       |
| 9. Social Desirability                      | 3/18    | 11.1 | 3.3  | -.32** | -.25** | -.14  | -.24** | .18*   | -.04  | -.13  | -.23** | 1      |     |       |
| 10. Time in treatment with opioids (months) | 3/300   | 46.7 | 50.5 | -.00   | -.02   | .07   | -.00   | -.05   | .09   | .10   | .09    | .15*   | 1   |       |
| 11. Misuse* (continuous)                    | 0/52    | 13.2 | 9.3  | .37**  | .42**  | .39** | .38**  | -.38** | .21** | .40** | .46**  | -.43** | .04 | 1     |
| 12. Misuse** (Dichotomous)                  |         |      |      | .37**  | .33**  | .22** | .29**  | -.31** | .13   | .31** | .35**  | -.32** | .06 | .70** |

\* Correlations between opioid misuse (continuous variable) and the other continuous variables

\*\* Biserial correlations between opioid misuse (dichotomous variable) and the continuous variables

Note. Significance level: \*\*  $p < .001$ ; \*  $p < .05$

<https://doi.org/10.1371/journal.pone.0334918.t002>

correlation between two quantitative variables [60], variables with a significant correlation coefficient equal to or greater than .20 in point biserial correlation and equal to or greater than .30 in Pearson bivariate correlations were included in the Study 2 analysis.

The associations between the variables and opioid misuse were in the directions indicated in the hypotheses (H4, H6-7, H10, and H12-16) and most of the associations reached statistical significance ( $p \leq .001$ ). Except for time in treatment with opioids, all the variables assumed to be associated with opioid misuse showed significant associations. In the Pearson bivariate correlation

analysis, pain intensity showed a low effect size but significant associations with opioid misuse ( $r < .30$ ). Impulsiveness, AS, PTSD, pain catastrophizing, pain acceptance, anxiety and depression symptoms, and social desirability showed medium effect sizes and significant associations with opioid misuse ( $r$  range from .37 to .46). In point biserial correlation, the association between pain intensity and opioid misuse was not significant. Impulsiveness, AS, pain acceptance, anxiety and depression symptoms, and social desirability showed medium effect sizes and significant associations with opioid misuse ( $r_{pb}$  range from .31 to .36), while PTSD symptoms and pain catastrophizing showed lower but significant associations ( $r_{pb} = .22$  and .29).

**Chi-square analysis.** The association between categorical antecedent variables and opioid misuse were tested with a Chi square tests and contingency analysis. Cramer's  $V$  was calculated to determine how strongly each categorical variable was associated with opioid misuse. Again, to be conservative in this first study, those variables whose association with opioid misuse obtained a value of Cramer's  $V$ 's equal to or greater than .20 were included in the analysis of Study 2. Furthermore, to avoid Type I errors, the significance level was adjusted to .006 or below. According to the hypothesis (H1, H3, H5, and H11), having a family history of alcohol abuse, a family history of drug abuse, a personal history of medication abuse, being between 16 and 45 years of age, a history of smoking and being a current smoker, and taking benzodiazepines or antidepressants were significantly associated with opioid misuse. However, only a family history of alcohol abuse, a family history of drug abuse, and being between 16 and 45 years of age reached satisfactory level of significance and Cramer's  $V$  size ( $\geq .20$ ). The results did not confirm hypotheses H2, H5, and H8. Table 3 shows the results of Chi-square analysis.

Therefore, in line with these results, the continuous variables that had to be included in Study 2 were as follows: Impulsiveness, AS, PTSD, anxiety and depression symptoms, pain catastrophizing, pain acceptance, social desirability and, regarding the categorical variables, having a family history of alcohol abuse, a family history of drug abuse, and being between 16 and 45 years of age.

## Study 2. cross validation

### Materials and methods (Study 2)

**Participants.** The participants of Study 2 consisted of 179 individuals who shared the same characteristics as those in Study 1 (individuals with CNCP from Spain who were recruited while attending clinical consultations in 3 pain

**Table 3. Frequencies and Chi-quare results in relation to categorical antecedent factors (N=187).**

| Antecedent Variables                                      | Sample 1 |    | $\chi^2$ | $p$  | Cramer's $V$ |
|-----------------------------------------------------------|----------|----|----------|------|--------------|
|                                                           | $n$      | %  |          |      |              |
| Family history of alcohol abuse                           | 69       | 37 | 7.78     | .006 | .20          |
| Family history of medication abuse                        | 15       | 8  | 0.01     | .999 | .04          |
| Family history of drug abuse                              | 36       | 19 | 8.30     | .004 | .21          |
| Personal history of alcohol abuse                         | 11       | 6  | 0.86     | .529 | .07          |
| Personal history of medication abuse                      | 13       | 7  | 6.28     | .016 | .18          |
| Personal history of drug abuse                            | 16       | 9  | 3.47     | .068 | .13          |
| Being between 16 and 45 years of age                      | 30       | 16 | 13.91    | .000 | .23          |
| History of preadolescent sexual abuse                     | 34       | 18 | 2.17     | .177 | .11          |
| Psychological disorder (ADD, OCD, bipolar, schizophrenia) | 3        | 2  | 2.08     | .272 | .11          |
| History of smoking and being a current smoker             | 61       | 33 | 4.65     | .039 | .16          |
| Body mass index more than 30                              | 59       | 32 | 0.54     | .515 | .06          |
| Sex (women)                                               | 123      | 66 | 2.45     | .158 | .11          |
| Benzodiazepine intake                                     | 136      | 73 | 4.83     | .040 | .16          |
| Antidepressant intake                                     | 123      | 66 | 3.46     | .081 | .14          |

*Note.* Frequencies and percentages indicate the presence of the characteristic (marked as a "yes" answer).

<https://doi.org/10.1371/journal.pone.0334918.t003>

units of general hospitals). Likewise, the inclusion and exclusion criteria were identical to those previously described (see Fig 2).

**Procedures.** The procedures used were the same as those carried out in Study 1.

**Measures.** The same instruments previously described were used to evaluate the variables of Study 2. The ORT-10 [37,38] was used to assess a family and personal history of substance abuse, and age. The BIS-11 [39–41] was used to measure impulsiveness. The ASI-3 [42,43] was used to measure the severity of AS symptoms. The PCL-5 [45] was used to assess PTSD. The PCS [46,47] was used to assess the degree to which respondents experience various catastrophizing-related thoughts and feelings when in pain. We administered the CPAQ-SV [48,49] to measure pain acceptance. Anxiety and depressions symptoms were measured with the HADS [49,50]. Again, a composite measure of characteristic pain intensity was computed for each participant by calculating the average of the least, average, worst, and current pain ratings. To assess prescribed opioid intake, we computed morphine milligram equivalents (MME) using the methods recommended by Dowell et al. [53]: MME/day; the current misuse of prescribed opioids was assessed by means of the COMM [54,55]. Finally, the MCSDS [57] was used to evaluate the potential impact of social desirability bias on responses.

**Statistical analysis.** Descriptive statistics were generated for the demographic, clinical, and other variables to describe the samples and study variables. According to the results obtained in Study 1, we modified the initial model of relationships, excluding all those variables that were not significantly associated with opioid misuse.

Firstly, we computed the Pearson correlation coefficients (COMM total score as a continuous variable) and the point biserial correlation coefficients (COMM as a dichotomous variable) between the variable opioid misuse and the psychological variables hypothesised as associated with prescription opioid misuse, according to the results of Study 1. In Study 2, to account for multiple comparisons, we applied a Bonferroni correction to the correlation analyses. Given that nine variables were tested, the significance threshold was adjusted to  $p < .0056$  (.05/9). This conservative approach was used

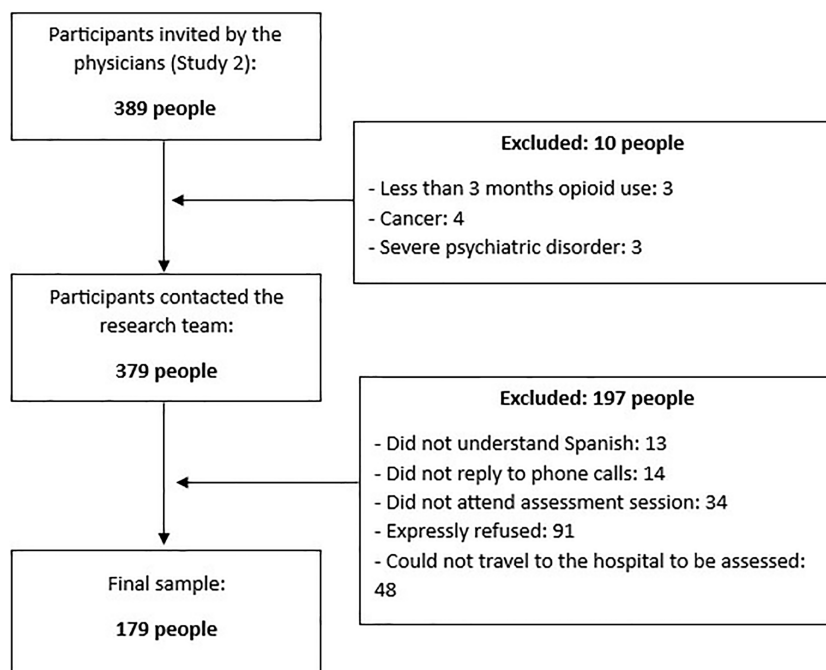

**Fig 2. Recruitment of Study 2 participants.**

<https://doi.org/10.1371/journal.pone.0334918.g002>

to reduce the likelihood of Type I errors and ensure the robustness of the observed associations. Again, Chi square tests and contingency analysis were used to test the association between opioid misuse and categorical variables, and Cramer's *V* was calculated as an effect size measurement for the chi-square test of independence.

Next, we performed a linear regression to analyse potential multicollinearity between the variables related to opioid misuse. The Variance Inflation Factor (VIF) was used as a measure of potential multicollinearity between the variables. There is no formal cutoff value for the VIF to determine the presence of multicollinearity [62]. In logistic regression, values of VIF above 2.5 may be of concern [63] and it is advisable to remove some of the variables causing multicollinearity from the model [62]. Consequently, we conducted a binomial logistic regression with opioid misuse as the response variable, including only the antecedent variables with a VIF value less than 2.5 in the regression model. Therefore, linear and binomial logistic regression analyses were used to identify significant associations between the set of variables included in the hypothesis and opioid misuse. The following step was taken to fit a parsimonious model with only strong predictive covariates. Binomial logistic regression was used to identify the combined effect of several factors. Using a forward stepwise procedure, the variables that achieved a *p* value .05 remained in the final model. The results are expressed as odds ratios (ORs) with 95% confidence intervals (CIs) and *p* values. A two-tailed *P* value of <.05 was used as a cutoff for statistical significance.

## Results (Study 2)

**Participants.** The recruitment process lasted from October 2022 to June 2023.

[Table 4](#) shows the participants' demographic and clinical characteristics.

In total, 25% of the participants had a score of more than 9 on the COMM, which indicates prescribed opioid misuse. Also, 51% of the participants had a prescription for benzodiazepines. Mean pain duration was 19 years (Mean = 229.9 months; SD = 190.7), and mean time on opioids was 61 months (SD = 59.5)

**Descriptive and correlation analyses.** [Table 5](#) shows the means and standard deviations of the continuous variables and the point biserial (COMM as a dichotomous variable) and Pearson bivariate (COMM as a continuous variable) correlation coefficients between continuous antecedent variables and the outcome variable *opioid misuse*.

The associations between the continuous variables and opioid misuse were in the expected directions. All the associations reached statistical significance ( $p \leq .001$ ). Impulsiveness, AS, pain acceptance, pain catastrophizing, PTSD, anxiety and depression symptoms showed medium-high effect sizes and a significant association with opioid misuse ( $r$  range from .33 to .60;  $r_{pb}$  range from .23 to .51). On the other hand, PTSD, anxiety, and depression symptoms, as well as pain catastrophizing showed high correlations with each other (coefficients of correlation range from .53 to .72). Although the association between social desirability and opioid misuse was significant in Study 1, the reliability of social desirability in Study 2 was not acceptable ( $\alpha = .65$ ), so this variable was not tested on this occasion.

**Chi-square analysis.** [Table 6](#) shows the results of Chi-square analysis.

**Regression analysis.** Opioid misuse was included as the outcome variable in the binomial logistic regression. The first step was to fit a parsimonious model with only strong covariates. For this purpose, a linear regression analysis was performed in two steps, introducing the total COMM score as the outcome variable and anxiety sensitivity, impulsivity, catastrophizing, pain acceptance and anxiety, depression, and PTSD symptoms as antecedent variables. The VIF was used as a measure of potential multicollinearity between the variables. Variables with VIF values greater than or equal to 2.5 were removed from the model. Therefore, Anxiety (VIF = 2.6) and depression (VIF = 2.5) symptoms were eliminated from the regression model. The regression analysis was performed in two steps. In step 1, the measures of AS and impulsiveness were entered. In step 2, pain acceptance, pain catastrophizing, and PTSD symptoms were entered. Variables with  $p \geq .1$  were excluded from the equation. Thus, a value of 0.1 was set as the threshold for the removal of variables to reduce the risk of overlooking potential predictors. As shown in [Table 7](#), AS ( $\beta = .14$ ,  $p = .05$ ), pain acceptance

**Table 4. Demographic and clinical characteristics of the study sample (sample 2: N= 179).**

| <b>Variables</b>                         | <b>Mean</b> | <b>SD</b> | <b>Min/max</b> |
|------------------------------------------|-------------|-----------|----------------|
| Age (years)                              | 60.3        | 12.2      | 26/84          |
| Time in pain (months)                    | 229.9       | 190.7     | 9/887          |
| Pain Intensity                           | 6.6         | 1.4       | 2.5/10         |
| Daily MME/day                            | 53.4        | 76.2      | 0.4/600        |
| Time in treatment with opioids (months)  | 60.7        | 59.5      | 6/360          |
|                                          | N           | %         |                |
| <b>Sex</b>                               |             |           |                |
| Men                                      | 64          | 36        |                |
| Women                                    | 115         | 64        |                |
| <b>Marital status</b>                    |             |           |                |
| Single                                   | 23          | 13        |                |
| Married/Unmarried couple                 | 122         | 68        |                |
| Divorced/Separated                       | 21          | 12        |                |
| Widowed                                  | 13          | 7         |                |
| <b>Education</b>                         |             |           |                |
| Reading and writing                      | 29          | 16        |                |
| Primary school                           | 60          | 33        |                |
| High school                              | 68          | 39        |                |
| University education                     | 22          | 12        |                |
| <b>Work Status</b>                       |             |           |                |
| Housekeeping                             | 12          | 7         |                |
| Working                                  | 42          | 23        |                |
| Studying                                 | 1           | 1         |                |
| Unemployed                               | 21          | 12        |                |
| Retired                                  | 103         | 57        |                |
| <b>Site of Pain</b>                      |             |           |                |
| Head                                     | 102         | 57        |                |
| Neck                                     | 134         | 75        |                |
| Chest                                    | 54          | 30        |                |
| Shoulders                                | 128         | 72        |                |
| Back (Lumbar)                            | 160         | 89        |                |
| Arms                                     | 121         | 68        |                |
| Hands                                    | 124         | 69        |                |
| Hips                                     | 133         | 74        |                |
| Thoracic                                 | 95          | 53        |                |
| Legs                                     | 154         | 86        |                |
| Feet                                     | 130         | 73        |                |
| <b>Diagnosis</b>                         |             |           |                |
| Functional pain syndromes (Fibromyalgia) | 46          | 26        |                |
| Complex regional pain syndrome           | 2           | 1         |                |
| Primary musculoskeletal pain             | 3           | 2         |                |
| Post-surgical/ Post-traumatic            | 27          | 15        |                |
| Neuropathic pain                         | 12          | 7         |                |
| Orofacial pain/Headaches                 | 1           | 1         |                |
| Musculoskeletal pain                     | 88          | 49        |                |
| <b>Medication use</b>                    |             |           |                |
| <b>Prescribed opioids</b>                |             |           |                |
| Tramadol                                 | 40          | 22        |                |
| Tramadol + Dexketoprofen                 | 4           | 2         |                |
| Tramadol + Paracetamol                   | 55          | 31        |                |
| Tapentadol                               | 33          | 18        |                |
| Fentanyl transdermal patch               | 22          | 12        |                |
| Fentanyl sublingual tablets              | 4           | 2         |                |
| Oxycodone                                | 3           | 2         |                |
| Oxycodone hydrochloride                  | 28          | 16        |                |
| Buprenorphine transdermal patch          | 2           | 1         |                |
| Morphine                                 | 7           | 4         |                |
| Codeine                                  | 4           | 2         |                |

(Continued)

**Table 4.** (Continued)

| Variables                                     | Mean | SD | Min/max |
|-----------------------------------------------|------|----|---------|
| <b>Adjuvant medications for treating pain</b> |      |    |         |
| Benzodiazepines                               | 92   | 51 |         |
| Antidepressants                               | 113  | 63 |         |
| Antiepileptic drugs                           | 99   | 55 |         |
| Hypnotics                                     | 10   | 6  |         |

Note. MME: Morphine Milligram Equivalents.

MME = 53.4 is considered a moderate dose

<https://doi.org/10.1371/journal.pone.0334918.t004>

**Table 5.** Means, standard deviations, and correlations between the variables (Sample 2: N = 179).

|                                  | Min/max | M    | SD   | 1     | 2      | 3     | 4      | 5      | 6     | 7     | 8     | 9        |
|----------------------------------|---------|------|------|-------|--------|-------|--------|--------|-------|-------|-------|----------|
| 1. Impulsiveness                 | 13/82   | 43.4 | 13.3 | 1     |        |       |        |        |       |       |       |          |
| 2. Anxiety Sensitivity           | 0/69    | 22.5 | 15.8 | .35** | 1      |       |        |        |       |       |       |          |
| 3. PTSD symptoms                 | 0/77    | 37.9 | 17.8 | .40** | .58**  | 1     |        |        |       |       |       |          |
| 4. Catastrophizing               | 13/52   | 36.3 | 10.5 | .32** | .54**  | .47** | 1      |        |       |       |       |          |
| 5. Acceptance                    | 9/108   | 52.4 | 21.1 | -.19* | -.39** | -.44* | -.63** | 1      |       |       |       |          |
| 6. Anxiety                       | 7/28    | 18.8 | 5.6  | .53** | .57**  | .72** | .56**  | -.49** | 1     |       |       |          |
| 7. Depression                    | 7/28    | 15.7 | 5.6  | .26** | .43**  | .64** | .50**  | -.64** | .63** | 1     |       |          |
| 8. Misuse* (continuous)          | 0/43    | 13.2 | 8.4  | .33** | .43**  | .49** | .45**  | -.47** | .60** | .51** | 1     |          |
| <b>9. Misuse** (Dichotomous)</b> |         |      |      | .23** | .35**  | .51** | .36**  | -.35** | .49** | .43** | .77** | <b>1</b> |

\* Correlations between opioid misuse (continuous variable) and the other continuous variables

\*\* Biserial correlations between opioid misuse (dichotomous variable) and the continuous variables

Note. Significance level: \*\*  $p < .001$ ; \*  $p < .05$

<https://doi.org/10.1371/journal.pone.0334918.t005>

( $\beta = -.31$ ,  $p < .001$ ), and PTSD ( $\beta = .29$ ,  $p < .001$ ) accounted for 36% of the opioid misuse. However, the contributions of impulsiveness ( $p = .09$ ) and pain catastrophizing ( $p = .19$ ) were not significant.

Finally, binomial logistic regression was used to identify the combined effect of impulsiveness, AS, pain catastrophizing, pain acceptance, and PTSD. The logistic regression model was statistically significant ( $\chi^2 = 15.766$ ,  $p = .04$ ) and explained 30% (Nagelkerke  $R^2$ ) of the variance in the criterion variable. The model correctly classified 74% of the cases. AS, pain acceptance, and the presence of symptoms of PTSD contributed significant unique variance to the prediction of the criterion variable; however, impulsiveness ( $p = .11$ ) and pain catastrophizing ( $p = .21$ ) were excluded. Table 8 shows the results of the logistic regression analysis.

## Discussion

Delimiting the variables with the most robust association with prescription opioid misuse could help in clinical practice, where time and resources are limited and it is not possible to assess all the potential factors to detect vulnerability to opioid misuse. As hypothesized, anxious symptoms (H6), depressive symptoms (H7), severity of PTSD (H10), AS (H12), impulsiveness (H13), pain catastrophizing (H14), and pain acceptance (H16) were considerably and consistently related to prescription opioid misuse in both samples. However, being aged between 16 and 45 years (H1), body mass index greater than 30 (H2), a history of smoking and being a current smoker (H3), time in treatment with opioids (H4), benzodiazepine use (H5), serious mental illness (H8), history of child sexual abuse (H9), and personal or family history of substance abuse (H11) were not consistently associated with opioid misuse in both studies.

**Table 6. Frequencies and Chi-quare results in relation to categorical antecedent factors (sample 2: N=179).**

| Antecedent Variables                 | Sample 2 |    | $\chi^2$ | $p$  | Cramer's V |
|--------------------------------------|----------|----|----------|------|------------|
|                                      | n        | %  |          |      |            |
| Family history of alcohol/drug abuse | 69       | 39 | 0.43     | .528 | .05        |
| Being between 16 and 45 years of age | 20       | 11 | 6.74     | .012 | .19        |

Note. Frequencies and percentages indicate the presence of the characteristic (marked as a "yes" answer).

The association between a family history of alcohol/drug abuse and opioid misuse was not significant ( $p = .528$ ). Only the association of age (being between 16 and 45 years of age), and opioid misuse was significant ( $p = .012$ ), although the magnitude of Cramer's V was low ( $V = .19$ ).

<https://doi.org/10.1371/journal.pone.0334918.t006>

**Table 7. Results of linear regression analysis of variables associated with the misuse of opioid pain medication prescription (COMM total score).**

| Step and Variables   | Beta (standardized) | $R^2$ | F       |
|----------------------|---------------------|-------|---------|
| Step 1               |                     | .31   | 27.35** |
| Anxiety sensitivity  | .35**               |       |         |
| Impulsiveness        | .21**               |       |         |
| Step 2               |                     | .36   | 26.42** |
| Anxiety sensitivity  | .14*                |       |         |
| Impulsiveness        | .11 ns              |       |         |
| Pain acceptance      | -.31**              |       |         |
| Pain catastrophizing | -.11 ns             |       |         |
| PTSD                 | .29**               |       |         |

\* $p < .05$ ; \*\* $p < .001$ ; ns= non-significant.

<https://doi.org/10.1371/journal.pone.0334918.t007>

**Table 8. Results of logistic regression analysis of variables associated with the prescription opioid misuse.**

|                     | Beta  | Wald | ORs   | $p$  | 95% C.I.-EXP(B) |       |
|---------------------|-------|------|-------|------|-----------------|-------|
|                     |       |      |       |      | low             | up    |
| Anxiety Sensitivity | .028  | 4.11 | 1.029 | .04  | 1.001           | 1.057 |
| Pain Acceptance     | -.028 | 8.21 | .972  | .004 | .954            | .991  |
| PTSD                | .035  | 9.28 | 1.035 | .002 | 1.012           | 1.058 |

The use of opioid pain medication was coded as 0=no use and 1=use.

<https://doi.org/10.1371/journal.pone.0334918.t008>

The results of this study showed that AS, pain acceptance, and PTSD symptoms were the variables with the most robust association with prescription opioid misuse. AS is consistently associated with the consumption of drugs that diminish arousal, such as opioids [30,56], since individuals high in AS fear anxiety-related sensations, more precisely bodily sensations, due to beliefs that these sensations will have catastrophic somatic, cognitive, or social consequences [64]. Additionally, there is a known association between AS and anxiety and depression disorders, which are highly prevalent in individuals with chronic pain [65], and between AS and PTSD [66]. At the same time, both the presence of anxiety and depression and PTSD are related to prescription opioid misuse [17,20]. A recent model proposed AS as a transdiagnostic factor accounting for the high comorbidity between anxiety, depression, and opioid misuse and its mutual maintenance [56]. These authors suggested that anxiety, depression, and opioid misuse could share common underlying vulnerabilities and that several factors may modulate these relationships, such as transdiagnostic factors (i.e., AS), trauma exposure, individual differences (i.e., age), and pain experience [56].

Anxiety sensitivity also plays a central role in the adaptation to chronic pain; specifically, in the Fear-Avoidance model of chronic pain [67,68], AS is the predisposition variable antecedent of the processes that lead to disability and depression (pain catastrophizing, fear of pain, hypervigilance, activity avoidance) [68]. Ditre et al. [29] proposed a model where AS played a central role in the mutual maintenance of chronic pain and opioid misuse. Thus, according to this model, AS would contribute to pain chronification through fear of pain and activity avoidance; when opioids are prescribed, they would also contribute to avoiding pain-related internal adverse events as well as opioid-related internal negative events (i.e., withdrawal symptoms).

Pain acceptance is also strongly associated with adaptation to chronic pain [69]. It involves responding to pain-related experiences without attempting to control or avoid them and engaging in valued activities regardless of these experiences [26]. In contrast to avoidance, pain acceptance may represent an adaptive form of “confrontation” [70]. As explained in the introduction section, acceptance is one of the elements of the transdiagnostic model of Psychological Flexibility [25], which considers that medication misuse functions as a form of experiential avoidance guided by the preeminence of the life value of eliminating pain at all costs [27]. There is preliminary evidence that pain acceptance is a protective factor concerning opioid misuse in people with chronic pain [71]. Specifically, Esteve et al. [24] found that pain acceptance was related to opioid misuse through lower anxiety and depression. In this sense, several theoretical models (i.e., [29,72]) have highlighted the role of negative reinforcement as a maintenance factor of addiction problems through a learned association between relief from aversive internal states (negative affect and pain) and opioid intake.

Our results support previous findings regarding PTSD symptoms. As mentioned above, having PTSD increases the risk of developing an opioid use disorder after contact with opioid painkillers [15,17–19]. Several reviews have indicated that 18% of people who use opioids also experience PTSD [20]; additionally, the misuse of prescription opioids is frequently reported among individuals with co-occurring chronic pain and PTSD [21]. Empirical literature has also demonstrated associations between CNCP, opioid misuse, and trauma exposure (e.g., [73]). Individuals who have been exposed to trauma, particularly interpersonal trauma, tend to perceive bodily signals as catastrophic and frightening [74]. Similarly, it has been suggested that individuals attempt to mitigate specific symptoms, including pain, when anxious thoughts are focused on them and they are perceived as uncontrollable [75]. Therefore, the use of opioid medication could represent an attempt to mitigate such symptoms.

Furthermore, anxiety (H6), and depression (H7) symptoms, impulsiveness (H13), and pain catastrophizing (H14) were strongly and consistently associated with prescription opioid misuse in both samples. However, anxiety and depression symptoms were not included in the final regression model to avoid multicollinearity and prevent statistical anomalies [76]. As mentioned above, this is an expected result, since the high co-morbidity among these variables is extensively documented; theoretical models of prescription opioid misuse integrate them through transdiagnostic variables and the mechanisms of adaptation to chronic pain [29].

On the other hand, although the associations of opioid misuse with pain catastrophizing and with impulsiveness were significant in the correlation analyses, they were not significant in the regression models. The empirical literature shows that pain catastrophizing is associated with opioid misuse [8,23]. Additionally, Martel et al. [23] suggested that impulsiveness could mediate the relationship between pain catastrophizing and prescription opioid misuse, while Peck et al. [77] found that impulsiveness underlies both opioid use disorder and PTSD.

In summary, the results of this study do not imply discarding the role of anxiety and depression symptoms, pain catastrophizing, and impulsiveness in prescription opioid misuse, but highlight that when several of the psychological factors associated with opioid misuse are considered together, AS, PTSD, and pain acceptance were the variables with the strongest association.

In contrast to previous research and the study hypotheses (H1-5, H8, H9, H11), neither study found a strong and consistent association between the demographic and clinical variables and prescription opioid misuse. The percentage of benzodiazepine use in the sample was very high. However, although co-occurring benzodiazepine and opioid use

has been associated with opioid use disorders [78], no association was found between benzodiazepine and antidepressant use and prescription opioid misuse in our sample. It has to be underlined that, according to previous research, some of these demographic and clinical variables are highly related to anxiety and depression and to the condition of having chronic pain. For example, people with obesity are at higher risk of chronic pain, and are more likely to receive prescription opioids for extended periods [79]. Moreover, people with depressive and anxious disorders will likely use anxiolytics and antidepressants and, interestingly, are more likely to be prescribed opioids and receive higher and stronger doses [80]. Furthermore, opioid and benzodiazepine co-use is more frequent among people with a history of abuse victimization [81].

Regarding the role of pain intensity, when controlling for psychological factors, the relationship between pain intensity and opioid misuse frequently disappears (i.e., [8]).

The association between opioid misuse and several other non-psychological variables, such as a family history of alcohol abuse, a family history of drug abuse, and being between 16 and 45 years of age, reached statistical significance in Study 1. However, in Study 2, these associations did not reach statistical significance, or the strength of the relationships was weak. These factors have been identified as being associated with the increased risk of addictive substance abuse. Some of the most widely studied risk factors include a previous history of addiction (e.g., [18]). Other studies have addressed predictors of abuse in relation to age, with contradictory results [13,38]. All of these variables are included in the Opioid Risk Tool (ORT; [38]), an instrument used to predict the risk of engaging in aberrant drug-related behaviour in patients with chronic pain receiving prescribed opioid therapy. However, the results of Esteve et al. [37] showed that the variables included in the ORT as being associated with opioid misuse were not actually associated with it, with the exception of being between 16 and 45 years of age. Therefore, according to the present and previous results, these variables do not appear to be the most strongly associated with prescription opioid misuse.

In Study 1, as hypothesised, social desirability and self-reported opioid misuse showed a significant negative association (H16). This result is in line with previous research showing that people with a strong desire to project a socially desirable image of themselves are less likely to self-report prescription opioid misuse and abuse and substance misuse and abuse in general [33]. In Study 2, we could not include social desirability in the analyses because of the low reliability of the measure. However, we must always be aware of the potential impact of social desirability on prescription opioid self-reports and take actions to control it.

When interpreting the results of this study, several limitations must be considered. The main limitation of this study is its exclusive reliance on self-report instruments; thus, future research should include more objective measures of those variables. Also, since this is a cross-sectional study, it is not possible to draw causal conclusions regarding the associations between the study variables. Longitudinal methods could be used in future studies. Regarding prescription opioid misuse, when possible, it would be advisable to use blood and urine tests alongside prescription records. Additionally, women were overrepresented; this ratio of women to men was not intentional but is representative of the general population with chronic pain [82]. Furthermore, the sample was relatively homogeneous in terms of sociodemographic characteristics, and all participants were recruited within the Spanish healthcare context. These factors may limit the generalizability of the findings to more diverse populations or to healthcare systems with different cultural, clinical, or regulatory approaches to chronic pain management and opioid prescribing. Future research should aim to replicate these findings in more heterogeneous samples and across different cultural or institutional contexts. Also, missing data were handled by replacing missing values with the mean of the available cases. While this is a simple and commonly used method, it may introduce potential biases, such as underestimating the variance and distorting relationships between variables. Therefore, findings should be interpreted with caution.

Finally, the scientific literature has identified a large number of variables potentially associated with prescription opioid misuse in people with CNCP. Although we have tried to be comprehensive, it is clear that our study cannot cover each and every variable potentially associated with opioid misuse, so we acknowledge that there may be additional variables that

have not been analysed. In any case, since each individual interview with the participants lasted between one and a half and two hours, the inclusion of additional variables, and therefore questionnaires, could lead to excessive fatigue among the interviewees. On the other hand, one of the strengths of this study is that we simultaneously followed a comprehensive and parsimonious strategy by first considering numerous well-documented variables associated with prescription opioid misuse in previous research and then reducing them to fewer variables based on their multicollinearity and the strength of their association with opioid misuse.

In summary, this study found that of the many variables associated with prescription opioid misuse in people with chronic pain in previous studies, three stand out: AS, PTSD symptoms, and pain acceptance. These variables are at the core of adaptation to chronic pain and are situated at the poles of avoidance and openness to the negative internal experiences associated with pain. However, the role of impulsivity, pain catastrophizing, and anxiety and depression symptoms in prescription opioid misuse should not be ruled out. In fact, the current results support the development of an instrument that, by evaluating all these variables, could help to identify people vulnerable to opioid misuse. Longitudinal studies will determine whether these variables can effectively predict the risk of opioid misuse in people with CNCP who have started taking opioid medication [83]. As a whole, these results highlight the critical role of psychological variables in opioid misuse. These variables also play a crucial role in the adaptation to chronic pain; thus, when prescribing opioids, clinicians should increase the supervision of those people with high AS, PTSD, and low pain acceptance. At the same time, psychological interventions aimed at promoting adaptation to chronic pain should routinely assess how people with CNCP relate to pain medication and intervene in this respect when necessary.

## Author contributions

**Conceptualization:** Carmen Ramírez-Maestre, Rosa Esteve, Elena R. Serrano-Ibáñez, Alicia E. López-Martínez.

**Data curation:** Elena R. Serrano-Ibáñez, Carmen Ramírez Maestre, Rosa Esteve.

**Investigation:** Elena R. Serrano-Ibáñez, Carmen Ramírez- Maestre.

**Methodology:** Carmen Ramírez-Maestre, Rosa Esteve.

**Project administration:** Carmen Ramírez-Maestre, Alicia E. López-Martínez.

**Supervision:** Carmen Ramírez-Maestre, Rosa Esteve, Elena R. Serrano-Ibáñez, Alicia E. López-Martínez.

**Writing – original draft:** Carmen Ramírez-Maestre, Rosa Esteve, Elena R. Serrano-Ibáñez, Alicia E. López-Martínez.

**Writing – review & editing:** Carmen Ramírez-Maestre, Rosa Esteve, Elena R. Serrano-Ibáñez, Alicia E. López-Martínez.

## References

1. Treede R-D, Rief W, Barke A, Aziz Q, Bennett MI, Benoliel R, et al. Chronic pain as a symptom or a disease: the IASP Classification of Chronic Pain for the International Classification of Diseases (ICD-11). *Pain*. 2019;160(1):19–27. <https://doi.org/10.1097/j.pain.0000000000001384> PMID: 30586067
2. Mathieson S, Wertheimer G, Maher CG, Christine Lin C-W, McLachlan AJ, Buchbinder R, et al. What proportion of patients with chronic noncancer pain are prescribed an opioid medicine? Systematic review and meta-regression of observational studies. *J Intern Med*. 2020;287(5):458–74. <https://doi.org/10.1111/joim.13026> PMID: 32100394
3. Busse JW, Wang L, Kamaleldin M, Craigie S, Riva JJ, Montoya L, et al. Opioids for Chronic Noncancer Pain: A Systematic Review and Meta-analysis. *JAMA*. 2018;320(23):2448–60. <https://doi.org/10.1001/jama.2018.18472> PMID: 30561481
4. Nury E, Schmucker C, Nagavci B, Motschall E, Nitschke K, Schulte E, et al. Efficacy and safety of strong opioids for chronic noncancer pain and chronic low back pain: a systematic review and meta-analyses. *Pain*. 2022;163(4):610–36. <https://doi.org/10.1097/j.pain.0000000000002423> PMID: 34326292
5. Dowell D, Ragan KR, Jones CM, Baldwin GT, Chou R. CDC Clinical Practice Guideline for Prescribing Opioids for Pain - United States, 2022. *MMWR Recomm Rep*. 2022;71(3):1–95. <https://doi.org/10.15585/mmwr.rr7103a1> PMID: 36327391

6. Pierce M, van Amsterdam J, Kalkman GA, Schellekens A, van den Brink W. Is Europe facing an opioid crisis like the United States? An analysis of opioid use and related adverse effects in 19 European countries between 2010 and 2018. *Eur Psychiatry*. 2021;64(1):e47. <https://doi.org/10.1192/j.eurpsy.2021.2219> PMID: [34165059](#)
7. Agencia Española de Medicamentos y Productos Sanitarios AEMPS. Utilización de medicamentos analgésicos opioides en España. 2024. <https://app.powerbi.com/view?r=eyJrJmYyZmZU3NzctOGFjMC00MTYwLTkyODAtNmJhZWY5YTE4MzM5liwidCI6IjJkM2I1MGUwLTZlZjQtNGViYy05M-jQ2LTdkMWNiYjc3MDg5YyIsImMiOj9>
8. Martel MO, Edwards RR, Jamison RN. The relative contribution of pain and psychological factors to opioid misuse: A 6-month observational study. *Am Psychol*. 2020;75(6):772–83. <https://doi.org/10.1037/amp0000632> PMID: [32915022](#)
9. Thomas KH, Dalili MN, Cheng H-Y, Dawson S, Donnelly N, Higgins JPT, et al. Prevalence of problematic pharmaceutical opioid use in patients with chronic non-cancer pain: A systematic review and meta-analysis. *Addiction*. 2024;119(11):1904–22. <https://doi.org/10.1111/add.16616> PMID: [39111346](#)
10. Zeng C, Dubreuil M, LaRochelle MR, Lu N, Wei J, Choi HK, et al. Association of Tramadol With All-Cause Mortality Among Patients With Osteoarthritis. *JAMA*. 2019;321(10):969–82. <https://doi.org/10.1001/jama.2019.1347> PMID: [30860559](#)
11. Chou R, Fanciullo GJ, Fine PG, Miaskowski C, Passik SD, Portenoy RK. Opioids for chronic noncancer pain: prediction and identification of aberrant drug-related behaviors: a review of the evidence for an American Pain Society and American Academy of Pain Medicine clinical practice guideline. *J Pain*. 2009;10(2):131–46. <https://doi.org/10.1016/j.jpain.2008.10.009> PMID: [19187890](#)
12. Hjstet J, Ekholm O, Kurita GP, Juel K, Sjgren P. Addictive behaviors related to opioid use for chronic pain: a population-based study. *Pain*. 2013;154(12):2677–83. <https://doi.org/10.1016/j.pain.2013.07.046> PMID: [23906554](#)
13. Shah A, Hayes CJ, Martin BC. Factors Influencing Long-Term Opioid Use Among Opioid Naive Patients: An Examination of Initial Prescription Characteristics and Pain Etiologies. *J Pain*. 2017;18(11):1374–83. <https://doi.org/10.1016/j.jpain.2017.06.010> PMID: [28711636](#)
14. Zvolensky MJ, Rogers AH, Garey L, Shepherd JM, Ditte JW. Opioid Misuse among Smokers with Chronic Pain: Relations with Substance Use and Mental Health. *Behav Med*. 2021;47(4):335–43. <https://doi.org/10.1080/08964289.2020.1742642> PMID: [34719341](#)
15. Ferrari R, Duse G, Capraro M, Visentin M. Risk assessment of opioid misuse in Italian patients with chronic noncancer pain. *Pain Res Treat*. 2014;2014:584986. <https://doi.org/10.1155/2014/584986> PMID: [25177499](#)
16. Rogers AH, Zvolensky MJ, Ditte JW, Buckner JD, Asmundson GJG. Association of opioid misuse with anxiety and depression: A systematic review of the literature. *Clin Psychol Rev*. 2021;84:101978. <https://doi.org/10.1016/j.cpr.2021.101978> PMID: [33515811](#)
17. Fogle BM, Kabel K, Shepherd JM, Rogers AH, Vujanovic AA, Zvolensky MJ. Posttraumatic stress and distress tolerance in relation to opioid misuse and dependence among trauma-exposed adults with chronic pain. *Exp Clin Psychopharmacol*. 2023;31(5):953–62. <https://doi.org/10.1037/pha0000661> PMID: [37261766](#)
18. Kaye AD, Jones MR, Kaye AM, Ripoll JG, Galan V, Beakley BD, et al. Prescription Opioid Abuse in Chronic Pain: An Updated Review of Opioid Abuse Predictors and Strategies to Curb Opioid Abuse: Part 1. *Pain Physician*. 2017;20(2S):S93–109. <https://doi.org/10.36076/ppj.2017.s109> PMID: [28226333](#)
19. Voon P, Karamouzian M, Kerr T. Chronic pain and opioid misuse: a review of reviews. *Subst Abuse Treat Prev Policy*. 2017;12(1):36. <https://doi.org/10.1186/s13011-017-0120-7> PMID: [28810899](#)
20. López-Martínez AE, Reyes-Pérez Á, Serrano-Ibáñez ER, Esteve R, Ramírez-Maestre C. Chronic pain, posttraumatic stress disorder, and opioid intake: A systematic review. *World J Clin Cases*. 2019;7(24):4254–69. <https://doi.org/10.12998/wjcc.v7.i24.4254> PMID: [31911906](#)
21. Santo T Jr, Campbell G, Gisev N, Degenhardt L. Exposure to childhood trauma increases risk of opioid use disorder among people prescribed opioids for chronic non-cancer pain. *Drug Alcohol Depend*. 2022;230:109199. <https://doi.org/10.1016/j.drugalcdep.2021.109199> PMID: [34875576](#)
22. Lee S-J, Koussa M, Gelberg L, Heinzerling K, Young SD. Somatization, mental health and pain catastrophizing factors associated with risk of opioid misuse among patients with chronic non-cancer pain. *Journal of Substance Use*. 2020;25(4):357–62. <https://doi.org/10.1080/14659891.2019.1704079>
23. Martel MO, Wasan AD, Jamison RN, Edwards RR. Catastrophic thinking and increased risk for prescription opioid misuse in patients with chronic pain. *Drug Alcohol Depend*. 2013;132(1–2):335–41. <https://doi.org/10.1016/j.drugalcdep.2013.02.034> PMID: [23618767](#)
24. Esteve R, Marcos E, Reyes-Pérez Á, López-Martínez AE, Ramírez-Maestre C. Pain Acceptance Creates an Emotional Context That Protects against the Misuse of Prescription Opioids: A Study in a Sample of Patients with Chronic Noncancer Pain. *Int J Environ Res Public Health*. 2021;18(6):3054. <https://doi.org/10.3390/ijerph18063054> PMID: [33809628](#)
25. Hayes SC, Follette VM, Linehan MM. *Mindfulness and Acceptance: Expanding the Cognitive-behavioral Tradition*. Estates United of America: Guilford Press. 2004.
26. McCracken LM, Eccleston C. A prospective study of acceptance of pain and patient functioning with chronic pain. *Pain*. 2005;118(1–2):164–9. <https://doi.org/10.1016/j.pain.2005.08.015> PMID: [16203093](#)
27. McCracken LM, Morley S. The psychological flexibility model: a basis for integration and progress in psychological approaches to chronic pain management. *J Pain*. 2014;15(3):221–34. <https://doi.org/10.1016/j.jpain.2013.10.014> PMID: [24581630](#)
28. Ramírez-Maestre C.; Barrado-Moreno V.; Esteve R.; Serrano-Ibáñez ER; de la Vega R.; Ruiz-Párraga GT.; Fernández Baena M.; Jensen M. & López-Martínez AE. Vulnerability Factors, Adjustment, and Opioid Misuse in Chronic Non-Cancer Pain Individuals, *J Pain* 2024;25(10): 104606. <https://doi.org/10.1016/j.jpain.2024.104606>

29. Ditre JW, Zale EL, LaRowe LR. A Reciprocal Model of Pain and Substance Use: Transdiagnostic Considerations, Clinical Implications, and Future Directions. *Annu Rev Clin Psychol*. 2019;15:503–28. <https://doi.org/10.1146/annurev-clinpsy-050718-095440> PMID: 30566371
30. Rogers AH MA, Kauffman BY MA, Bakhshaie J MD, McHugh RK PhD, Ditre JW PhD, Zvolensky MJ PhD. Anxiety sensitivity and opioid misuse among opioid-using adults with chronic pain. *Am J Drug Alcohol Abuse*. 2019;45(5):470–8. <https://doi.org/10.1080/00952990.2019.1569670> PMID: 30896985
31. Vest N, Reynolds CJ, Tragesser SL. Impulsivity and risk for prescription opioid misuse in a chronic pain patient sample. *Addict Behav*. 2016;60:184–90. <https://doi.org/10.1016/j.addbeh.2016.04.015> PMID: 27156219
32. Vlaeyen JWS, Linton SJ. Fear-avoidance and its consequences in chronic musculoskeletal pain: a state of the art. *Pain*. 2000;85(3):317–32. [https://doi.org/10.1016/S0304-3959\(99\)00242-0](https://doi.org/10.1016/S0304-3959(99)00242-0) PMID: 10781906
33. Stephenson JJ, Cepeda MS, Zhang J, Dinh J, Hall K, Esposito DB, et al. The Association Between Doctor and Pharmacy Shopping and Self-Reported Misuse and Abuse of Prescription Opioids: A Survey Study. *J Pain Res*. 2020;13:689–701. <https://doi.org/10.2147/JPR.S232409> PMID: 32308468
34. Miller CC, Reardon MJ, Safi HJ. Risk stratification: a practical guide for clinicians. United Kingdom: Cambridge University Press. 2001.
35. Green SB. How Many Subjects Does It Take To Do A Regression Analysis. *Multivariate Behav Res*. 1991;26(3):499–510. [https://doi.org/10.1207/s15327906mbr2603\\_7](https://doi.org/10.1207/s15327906mbr2603_7) PMID: 26776715
36. Freeman DH. Applied Categorical Data Analysis. Marcel Dekker. 1987.
37. Esteve R, Reyes-Pérez Á, Ramírez-Maestre C, Gutiérrez-Extremera A, Fuentes-Bravo R, de la Vega R, et al. Diagnostic and Predictive Capacity of the Spanish Versions of the Opioid Risk Tool and the Screener and Opioid Assessment for Patients with Pain-Revised: A Preliminary Investigation in a Sample of People with Noncancer Chronic Pain. *Pain Ther*. 2022;11(2):493–510. <https://doi.org/10.1007/s40122-022-00356-2> PMID: 35128624
38. Webster LR, Webster RM. Predicting aberrant behaviors in opioid-treated patients: preliminary validation of the Opioid Risk Tool. *Pain Med*. 2005;6(6):432–42. <https://doi.org/10.1111/j.1526-4637.2005.00072.x> PMID: 16336480
39. Oquendo MA, Baca-García E, Graver R, Morales M, Montalvan V, Mann JJ. Spanish adaptation of the Barratt Impulsiveness Scale (BIS-11). *Eur J Psychiatry*. 2001;15(3):147–55.
40. Patton JH, Stanford MS, Barratt ES. Factor structure of the Barratt impulsiveness scale. *J Clin Psychol*. 1995;51(6):768–74. [https://doi.org/10.1002/1097-4679\(199511\)51:6<768::aid-jclp2270510607>3.0.co;2-1](https://doi.org/10.1002/1097-4679(199511)51:6<768::aid-jclp2270510607>3.0.co;2-1) PMID: 8778124
41. Stanford MS, Mathias CW, Dougherty DM, Lake SL, Anderson NE, Patton JH. Fifty years of the Barratt Impulsiveness Scale: An update and review. *Personality and Individual Differences*. 2009;47(5):385–95. <https://doi.org/10.1016/j.paid.2009.04.008>
42. Sandín B, Valiente RM, Chorot P, Santed Germán MA. ASI-3 : Nueva escala para la evaluación de la sensibilidad a la ansiedad. *RPPC*. 2007;12(2). <https://doi.org/10.5944/rppc.vol.12.num.2.2007.4036>
43. Taylor S, Zvolensky MJ, Cox BJ, Deacon B, Heimberg RG, Ledley DR, et al. Robust dimensions of anxiety sensitivity: development and initial validation of the Anxiety Sensitivity Index-3. *Psychol Assess*. 2007;19(2):176–88. <https://doi.org/10.1037/1040-3590.19.2.176> PMID: 17563199
44. Allan NP, Korte KJ, Capron DW, Raines AM, Schmidt NB. Factor mixture modeling of anxiety sensitivity: a three-class structure. *Psychol Assess*. 2014;26(4):1184–95. <https://doi.org/10.1037/a0037436> PMID: 25068913
45. Weathers FW, Litz BT, Keane TM, Palmieri PA, Marx BP, Schnurr PP. The PTSD Checklist for DSM-5 (PCL-5). <https://www.ptsd.va.gov/professional/assessment/adult-sr/ptsd-checklist.asp>. 2013.
46. Muñoz M, Esteve R. Reports of memory functioning by patients with chronic pain. *Clin J Pain*. 2005;21(4):287–91. <https://doi.org/10.1097/01.aip.0000173993.53733.2e> PMID: 15951644
47. Sullivan MJL, Bishop SR, Pivik J. The Pain Catastrophizing Scale: Development and validation. *Psychological Assessment*. 1995;7(4):524–32. <https://doi.org/10.1037/1040-3590.7.4.524>
48. Bendayan R, Esteve R, Blanca MJ. New empirical evidence of the validity of the Chronic Pain Acceptance Questionnaire: the differential influence of activity engagement and pain willingness on adjustment to chronic pain. *Br J Health Psychol*. 2012;17(2):314–26. <https://doi.org/10.1111/j.2044-8287.2011.02039.x> PMID: 22107355
49. McCracken LM, Vowles KE, Eccleston C. Acceptance of chronic pain: component analysis and a revised assessment method. *Pain*. 2004;107(1–2):159–66. <https://doi.org/10.1016/j.pain.2003.10.012> PMID: 14715402
50. Quintana JM, Padierna A, Esteban C, Arostegui I, Bilbao A, Ruiz I. Evaluation of the psychometric characteristics of the Spanish version of the Hospital Anxiety and Depression Scale. *Acta Psychiatr Scand*. 2003;107(3):216–21. <https://doi.org/10.1034/j.1600-0447.2003.00062.x> PMID: 12580829
51. Zigmond AS, Snaith RP. The hospital anxiety and depression scale. *Acta Psychiatr Scand*. 1983;67(6):361–70. <https://doi.org/10.1111/j.1600-0447.1983.tb09716.x> PMID: 6880820
52. Jensen MP, Turner JA, Romano JM, Fisher LD. Comparative reliability and validity of chronic pain intensity measures. *Pain*. 1999;83(2):157–62. [https://doi.org/10.1016/S0304-3959\(99\)00101-3](https://doi.org/10.1016/S0304-3959(99)00101-3) PMID: 10534586
53. Dowell D, Haegerich TM. Using the CDC Guideline and Tools for Opioid Prescribing in Patients with Chronic Pain. *Am Fam Physician*. 2016;93(12):970–2. PMID: 27304765

54. Butler SF, Budman SH, Fernandez KC, Houle B, Benoit C, Katz N, et al. Development and validation of the Current Opioid Misuse Measure. *Pain*. 2007;130(1–2):144–56. <https://doi.org/10.1016/j.pain.2007.01.014> PMID: 17493754
55. Reyes-Pérez Á, López-Martínez AE, Esteve R, Ramírez-Maestre C. Spanish Validation of the COMM Scale to Assess the Misuse of Prescription Opioids in Patients with Chronic Noncancer Pain. *Int J Ment Health Addict*. 2022;:1–15. <https://doi.org/10.1007/s11469-022-00803-3> PMID: 35342377
56. Rogers AH, Orr MF, Shepherd JM, Bakhshaie J, Ditre JW, Buckner JD, et al. Anxiety, depression, and opioid misuse among adults with chronic pain: the role of emotion dysregulation. *J Behav Med*. 2021;44(1):66–73. <https://doi.org/10.1007/s10865-020-00169-8> PMID: 32594288
57. Gutiérrez S, Sanz J, Espinosa R, Gesteira C, García-Vera MP. La Escala de Deseabilidad Social de Marlowe-Crowne: baremos para la población general española y desarrollo de una versión breve. *AN PSICOL-SPAIN*. 2015;32(1):206. <https://doi.org/10.6018/analesps.32.1.185471>
58. Cohen J. Statistical power analysis for the behavioral sciences. 2nd ed. United States of America: Lawrence Erlbaum Associates Inc. 1988.
59. LeBlanc V, Cox MAA. Interpretation of the point-biserial correlation coefficient in the context of a school examination. *TQMP*. 2017;13(1):46–56. <https://doi.org/10.20982/tqmp.13.1.p046>
60. Bonett DG. Point-biserial correlation: Interval estimation, hypothesis testing, meta-analysis, and sample size determination. *Br J Math Stat Psychol*. 2020;73 Suppl 1:113–44. <https://doi.org/10.1111/bmsp.12189> PMID: 31565811
61. Sun S, Pan W, Wang LL. A comprehensive review of effect size reporting and interpreting practices in academic journals in education and psychology. *Journal of Educational Psychology*. 2010;102(4):989–1004. <https://doi.org/10.1037/a0019507>
62. Midi H, Sarkar SK, Rana S. Collinearity diagnostics of binary logistic regression model. *Journal of Interdisciplinary Mathematics*. 2010;13(3):253–67. <https://doi.org/10.1080/09720502.2010.10700699>
63. Allison PD. Logistic regression using SAS: Theory and application. Cary, North Carolina, USA: SAS Institute, Inc. 2012.
64. Reiss S, Peterson RA, Gursky DM, McNally RJ. Anxiety sensitivity, anxiety frequency and the prediction of fearfulness. *Behav Res Ther*. 1986;24(1):1–8. [https://doi.org/10.1016/0005-7967\(86\)90143-9](https://doi.org/10.1016/0005-7967(86)90143-9) PMID: 3947307
65. Baek I, Lee E, Kim J. Differences in anxiety sensitivity factors between anxiety and depressive disorders. *Depress Anxiety*. 2019;36(10):968–74. <https://doi.org/10.1002/da.22948>
66. Feldner MT, Lewis SF, Leen-Feldner EW, Schnurr PP, Zvolensky MJ. Anxiety Sensitivity as a Moderator of the Relation Between Trauma Exposure Frequency and Posttraumatic Stress Symptomatology. *J Cogn Psychother*. 2006;20(2):201–13. <https://doi.org/10.1891/jcop.20.2.201>
67. Norton PJ, Asmundson GJG. Amending the fear-avoidance model of chronic pain: What is the role of physiological arousal? *Behavior Therapy*. 2003;34(1):17–30. [https://doi.org/10.1016/s0005-7894\(03\)80019-9](https://doi.org/10.1016/s0005-7894(03)80019-9)
68. Esteve R, Ramírez-Maestre C. Pain fear avoidance and pain acceptance: a cross-sectional study comparing their influence on adjustment to chronic pain across three samples of patients. *Ann Behav Med*. 2013;46(2):169–80. <https://doi.org/10.1007/s12160-013-9499-1> PMID: 23585191
69. Thompson M, McCracken LM. Acceptance and related processes in adjustment to chronic pain. *Curr Pain Headache Rep*. 2011;15(2):144–51. <https://doi.org/10.1007/s11916-010-0170-2> PMID: 21222244
70. Ramírez-Maestre C, Esteve R, López-Martínez A. Fear-avoidance, pain acceptance and adjustment to chronic pain: a cross-sectional study on a sample of 686 patients with chronic spinal pain. *Ann Behav Med*. 2014;48(3):402–10. <https://doi.org/10.1007/s12160-014-9619-6> PMID: 24722965
71. Smit T, Mayorga NA, Rogers AH, Nizio P, Zvolensky MJ. Chronic pain acceptance: Relations to opioid misuse and pain management motives among individuals with chronic low back pain. *Addict Behav*. 2023;136:107495. <https://doi.org/10.1016/j.addbeh.2022.107495> PMID: 36156453
72. Koob GF. Neurobiology of Opioid Addiction: Opponent Process, Hyperkatifeia, and Negative Reinforcement. *Biol Psychiatry*. 2020;87(1):44–53. <https://doi.org/10.1016/j.biopsych.2019.05.023> PMID: 31400808
73. Castellanos S, Cooke A, Koenders S, Joshi N, Miaskowski C, Kushel M, et al. Accounting for the interplay of interpersonal and structural trauma in the treatment of chronic non-cancer pain, opioid use disorder, and mental health in urban safety-net primary care clinics. *SSM Ment Health*. 2023;4:100243. <https://doi.org/10.1016/j.ssmmh.2023.100243> PMID: 38464953
74. Tsur SR. Trauma Resilience and Trauma Pathology: A Role for Neuropeptidergic Modulation in the Dentate Gyrus, 2022 (Doctoral dissertation, University of Haifa (Israel)).
75. Kind S, Otis JD. The Interaction Between Chronic Pain and PTSD. *Curr Pain Headache Rep*. 2019;23(12):91. <https://doi.org/10.1007/s11916-019-0828-3> PMID: 31781875
76. Weger UW. Avoiding “False Alarms” and “Misses” in Psychological Theory Building: Complementing the Principle of Parsimony With the Principle of Tentative Affirmation. *Psychol Rep*. 2020;123(3):983–99. <https://doi.org/10.1177/0033294119835760> PMID: 30857480
77. Peck KR, Nighbor TD, Price M. Examining associations between impulsivity, opioid use disorder, and posttraumatic stress disorder: The additive relation between disorders. *Experimental and Clinical Psychopharmacology*. 2022;30(5):486–93. <https://doi.org/10.1037/pha0000507>
78. Cochran BN, Flentje A, Heck NC, Van Den Bos J, Perlman D, Torres J, et al. Factors predicting development of opioid use disorders among individuals who receive an initial opioid prescription: mathematical modeling using a database of commercially-insured individuals. *Drug Alcohol Depend*. 2014;138:202–8. <https://doi.org/10.1016/j.drugalcdep.2014.02.701> PMID: 24679839
79. Stokes A, Berry KM, Collins JM, Hsiao C-W, Waggoner JR, Johnston SS, et al. The contribution of obesity to prescription opioid use in the United States. *Pain*. 2019;160(10):2255–62. <https://doi.org/10.1097/j.pain.0000000000001612> PMID: 31149978

80. Ramírez-Maestre C, Reyes-Pérez Á, Esteve R, López-Martínez AE, Bernardes S, Jensen MP. Opioid Pain Medication Prescription for Chronic Pain in Primary Care Centers: The Roles of Pain Acceptance, Pain Intensity, Depressive Symptoms, Pain Catastrophizing, Sex, and Age. *Int J Environ Res Public Health*. 2020;17(17):6428. <https://doi.org/10.3390/ijerph17176428> PMID: [32899359](https://pubmed.ncbi.nlm.nih.gov/32899359/)
81. Pierce J, Moser S, Hassett AL, Brummett CM, Christianson JA, Goesling J. Influence of Abuse History on Concurrent Benzodiazepine and Opioid Use in Chronic Pain Patients. *J Pain*. 2019;20(4):473–80. <https://doi.org/10.1016/j.jpain.2018.10.009> PMID: [30453108](https://pubmed.ncbi.nlm.nih.gov/30453108/)
82. Dueñas M, De Sola H, Salazar A, Esquivia A, Rubio S, Failde I. Prevalence and epidemiological characteristics of chronic pain in the Spanish population. Results from the pain barometer. *Eur J Pain*. 2025;29(1):e4705. <https://doi.org/10.1002/ejp.4705> PMID: [39046161](https://pubmed.ncbi.nlm.nih.gov/39046161/)
83. Ramírez-Maestre C, López-Martínez AE, Esteve R. Predictive variables of prescription opioid misuse in patients with chronic noncancer pain. Development of a risk detection scale: A registered report protocol. *PLoS One*. 2021;16(5):e0251586. <https://doi.org/10.1371/journal.pone.0251586> PMID: [33984037](https://pubmed.ncbi.nlm.nih.gov/33984037/)
